# Supplementary material for: A Deep Learning Algorithm for Detecting Acute Pericarditis by Electrocardiogram
Source: MDPI journal article supplement (doi:10.3390/jpm12071150), 2022-07-15
Supplement: s1 [file s1]

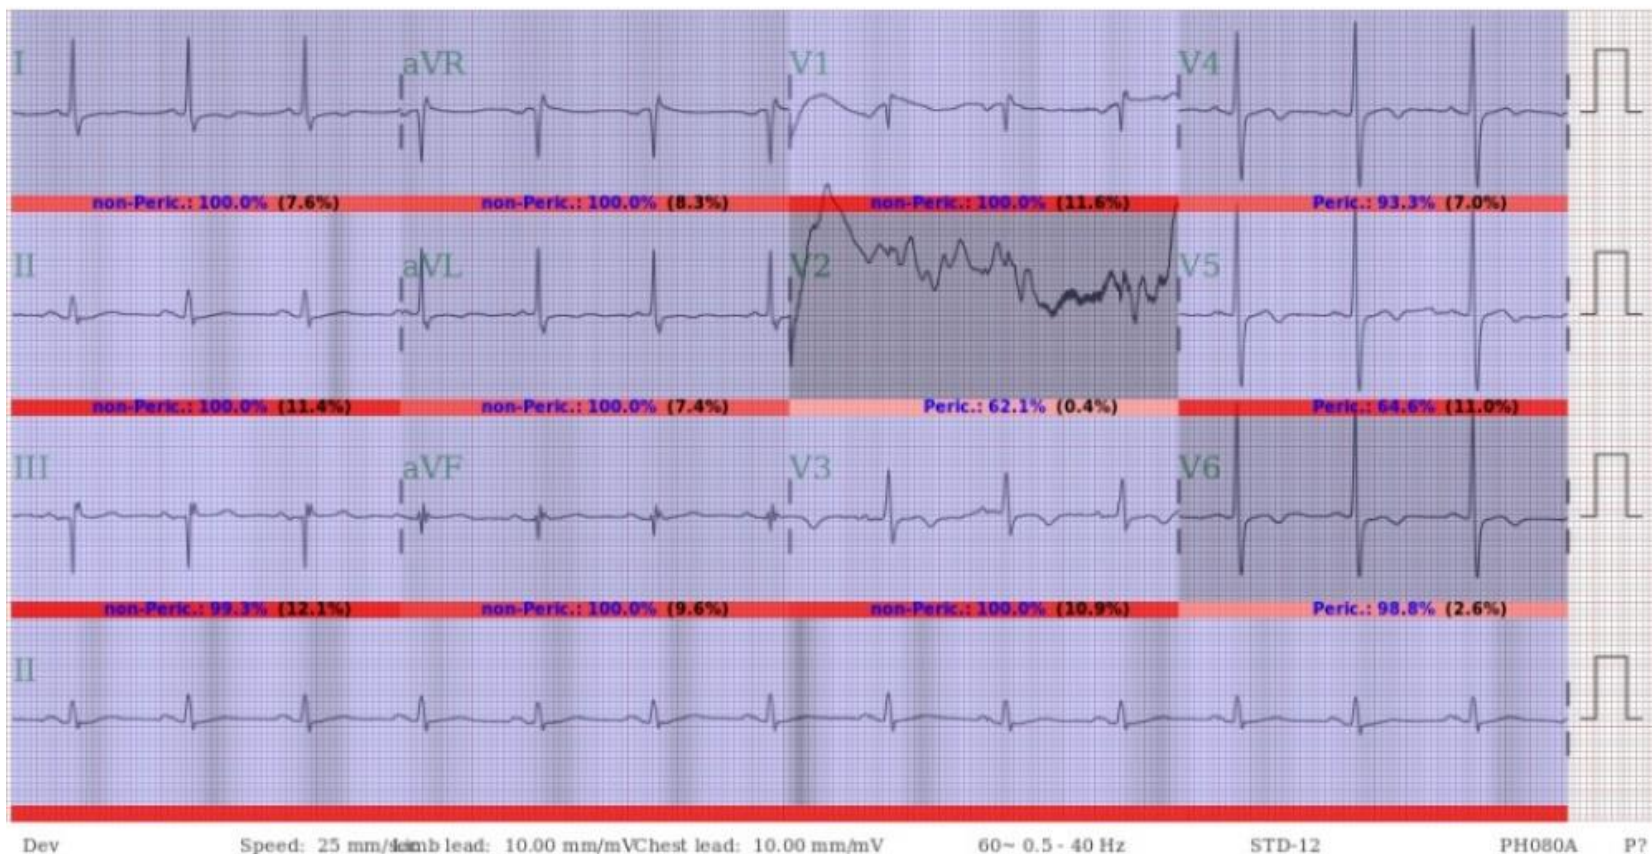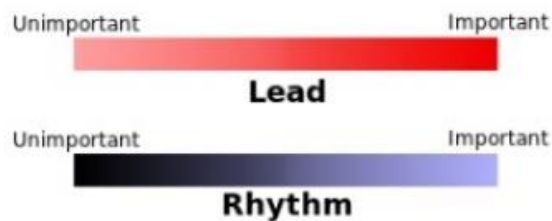

### AI prediction:

Peric.: 50.4%  
non-Peric.: 49.6%

Rate: 80  
PR: 157  
QRSd: 109  
QT: 361  
QTc: 417  
Axes\_P: 43  
Axes\_RS: 10  
Axes\_T: 78

**Supplementary Case S1.** ECG of an acute pericarditis case identified by the pericarditis-DLM. A 77-year-old man presented with fever, acute chest pain and dyspnea. The ECG revealed sinus rhythm with inverted T waves in precordial leads and Q waves in leads III and aVF. Our pericarditis-DLM correctly recognized it as acute pericarditis, which was misdiagnosed by human experts.

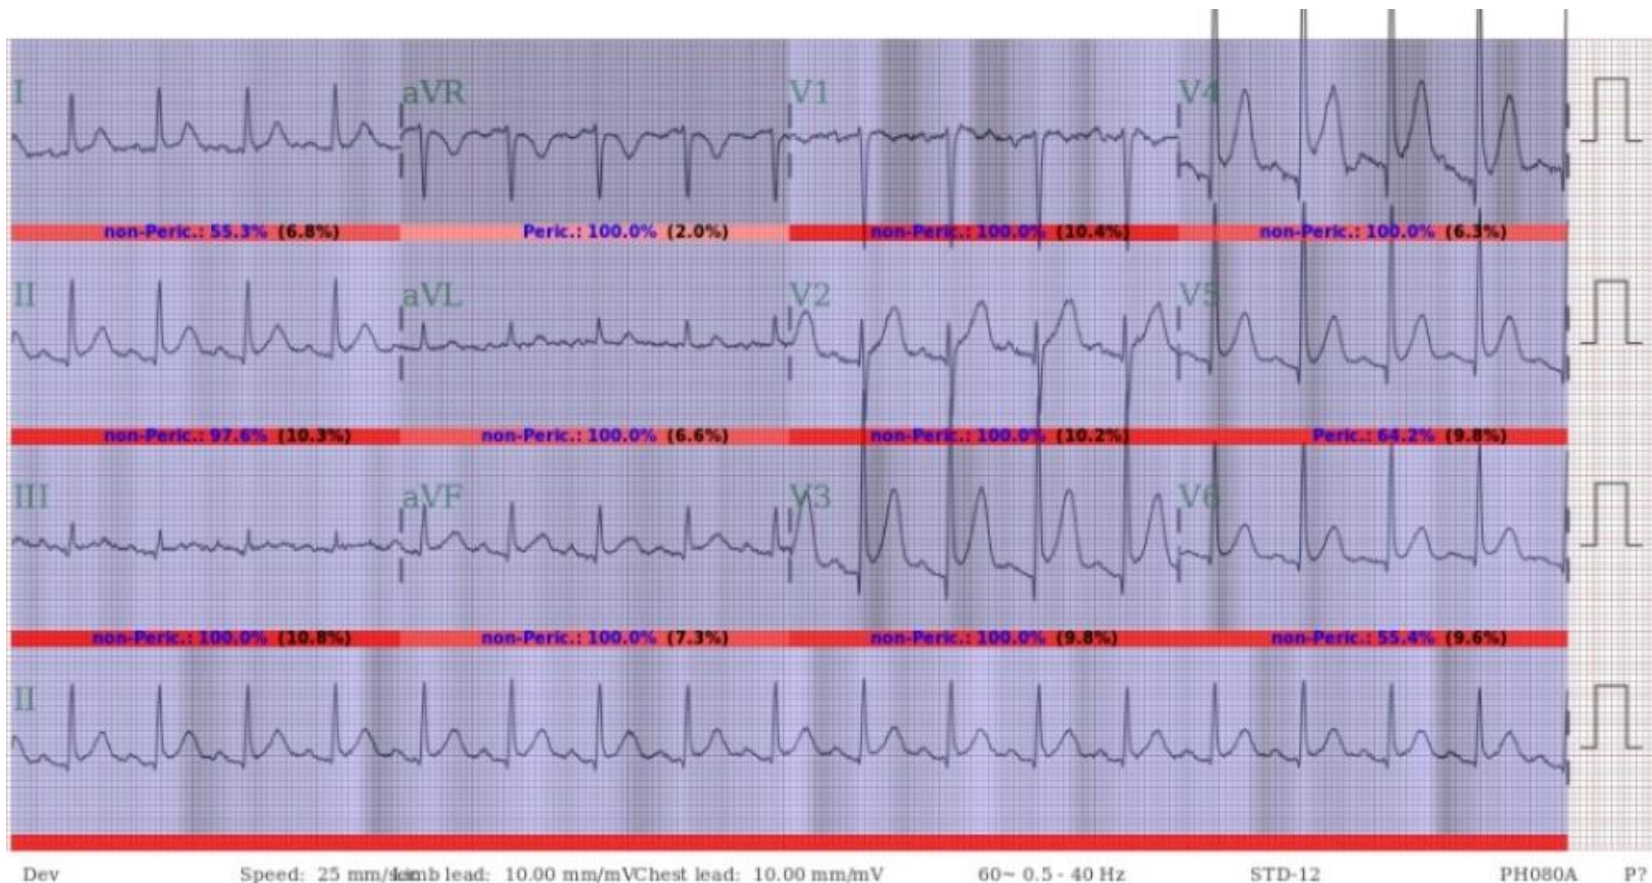

### AI prediction:

Peric.: 32.3%  
non-Peric.: 67.7%

Rate: 106  
PR: 185  
QRSd: 75  
QT: 352  
QTc: 468  
Axes\_P: 74  
Axes\_RS: 42  
Axes\_T: 50

**Supplementary Case S2.** ECG of an acute pericarditis case but unrecognized by the pericarditis DLM. A 74-year-old man presented with fever, dyspnea, and sustained tachycardia. The ECG revealed sinus rhythm with widespread, concave ST-segment elevation and PR-segment elevation in lead aVR. Our pericarditis-DLM misidentified it as non-pericarditis, and all human experts correctly diagnosed it as acute pericarditis.
